# Supplementary material
Source: publisher figshare collection journal article supplement (https://acs.figshare.com/ndownloader/files/5186374)
Supplement: Supplementary file 1 [file 5186374]

ARTICLE

## Supporting Information

**Table T-1.** Physicochemical properties of products obtained using various acid sources without and with stirring state. All samples were synthesized at a similar mixing ratio to the basic reaction mixture 30°C for 6 h using HNO<sub>3</sub>, HBr, and H<sub>2</sub>SO<sub>4</sub> in place of HCl.

| Acid source                    | Stirring state | S <sub>BET</sub> (m <sup>2</sup> /g) | V <sub>meso</sub> (ml/g) | V <sub>micro</sub> (ml/g) | D <sub>meso</sub> (nm) | d <sub>001</sub> (nm) |
|--------------------------------|----------------|--------------------------------------|--------------------------|---------------------------|------------------------|-----------------------|
| HNO <sub>3</sub>               | without        | 732                                  | 0.50                     | 0.08                      | 4.00                   | 7.03                  |
| HNO <sub>3</sub>               | with           | 889                                  | 0.66                     | 0.11                      | 4.48                   | 7.75                  |
| HBr                            | without        | 819                                  | 0.58                     | 0.08                      | 4.60                   | 8.18                  |
| HBr                            | with           | 879                                  | 0.62                     | 0.14                      | 4.60                   | 8.03                  |
| H <sub>2</sub> SO <sub>4</sub> | without        | 745                                  | 0.67                     | 0.08                      | 5.86                   | 8.18                  |
| H <sub>2</sub> SO <sub>4</sub> | with           | 800                                  | 0.64                     | 0.10                      | 5.06                   | 8.18                  |

All notations are consistent with those in Table 1.

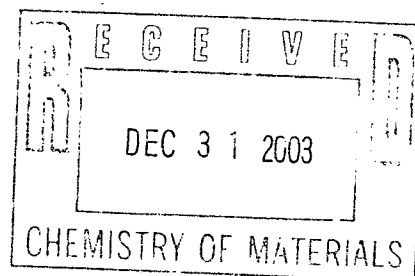

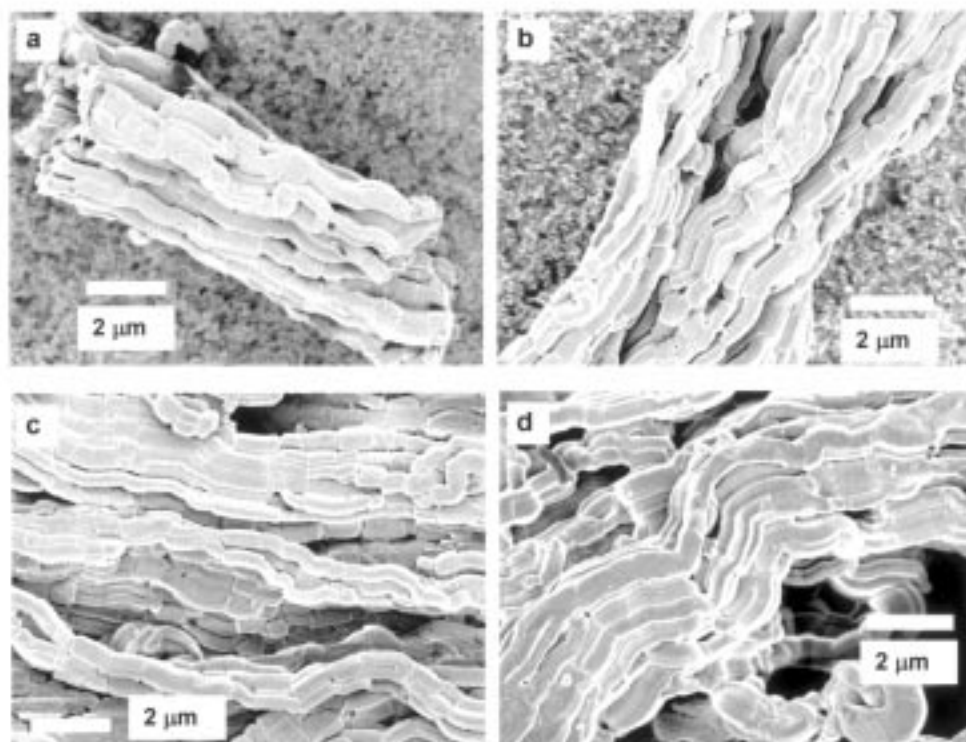

**Figure S-1.** FE-SEM images of fiber-like Samples FB (a), FC (b), FI (b), and the products obtained using  $\text{H}_2\text{SO}_4$ . They show that all fiber-like silicas have similar microstructures with coupling of rod-like particles of which respective length and width are almost identical, at *ca.* 1  $\mu\text{m}$  and *ca.* 0.5  $\mu\text{m}$ , irrespective of their different macroscopic sizes.

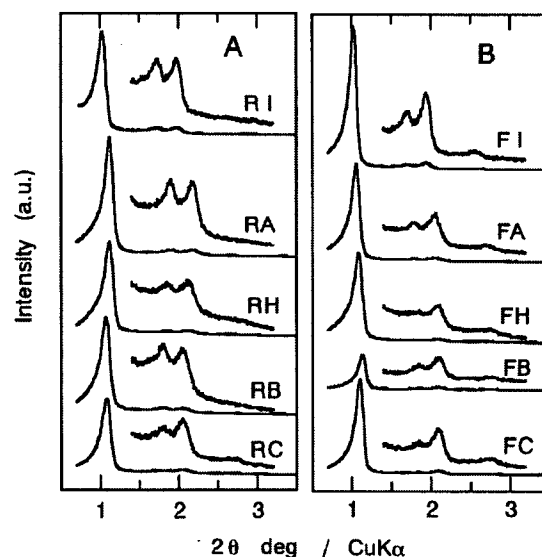

**Figure S-2.** Powder X-ray diffraction patterns of the representative (A) rod-like and (B) fibrous SBA-15 samples. A part of the pattern for all samples is drawn at ten magnifications. Letters in the figures correspond to sample names listed in Table 1.

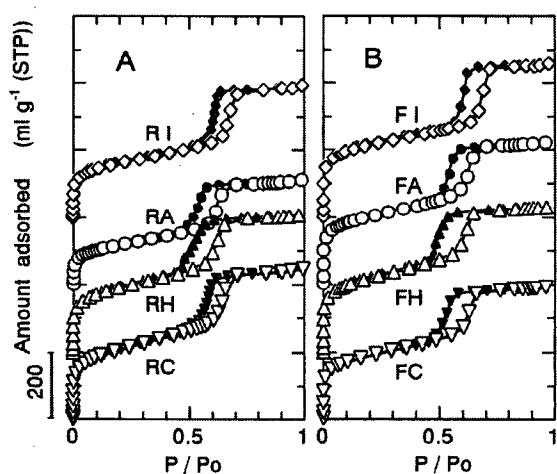

**Figure S-3.** Nitrogen sorption isotherms of the corresponding samples in Figure S-2. Open-adsorption; closed-desorption. Isotherms are offset by 200 ml/g for clarity.

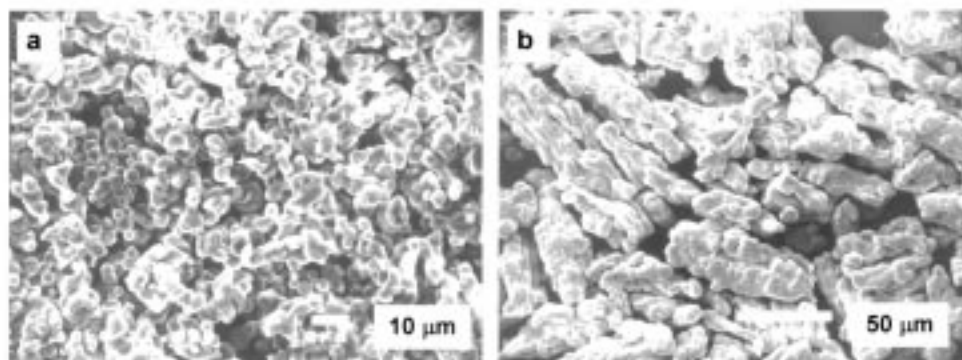

**Figure S-4.** SEM micrographs of the samples obtained using  $\text{HNO}_3$  as an acid source (a) without and (b) with stirring. Formation of nearly spherical particles while agglomerated under static condition (Figure S-4a) and slight further elongation of such aggregates upon shearing flow (Figure S-4b) reflects rapid silica precipitation immediately after induction time. Each corresponding SEM image for HBr was very similar to these respective images.

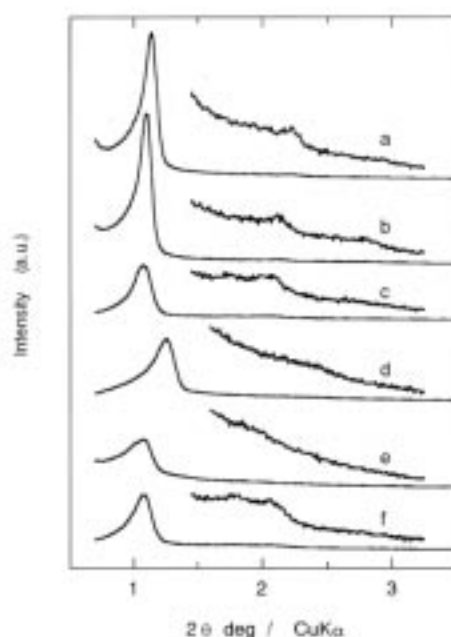

**Figure S-5.** Powder X-ray diffraction patterns of products obtained using various acid sources at a similar mixing ratio to the basic reaction mixture at  $30^\circ\text{C}$  for 6 h using  $\text{HNO}_3$ , HBr, and  $\text{H}_2\text{SO}_4$  in place of HCl: (a), (d)  $\text{HNO}_3$ ; (b), (e) HBr; and (c), (f)  $\text{H}_2\text{SO}_4$ . Lines (a), (b), (c) show results with stirring and (d), (e), (f) under static conditions. A part of the pattern for all samples is drawn at ten magnifications.

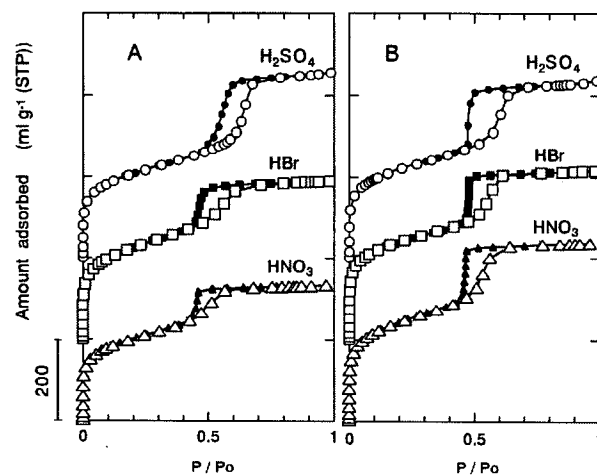

**Figure S-6.** Nitrogen sorption isotherms of corresponding samples in Figure S-5 obtained using various acid sources (A) under static and (B) with stirring conditions. Open-adsorption; closed-desorption. Isotherms are offset by 200 ml/g for clarity.

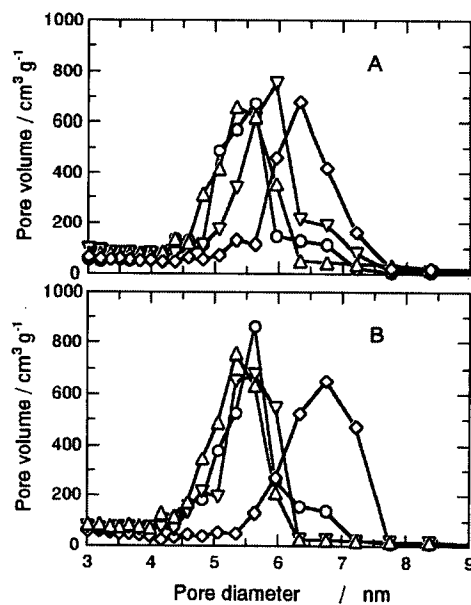

**Figure S-7.** BJH pore size distribution curves of corresponding samples in Figure S-6.

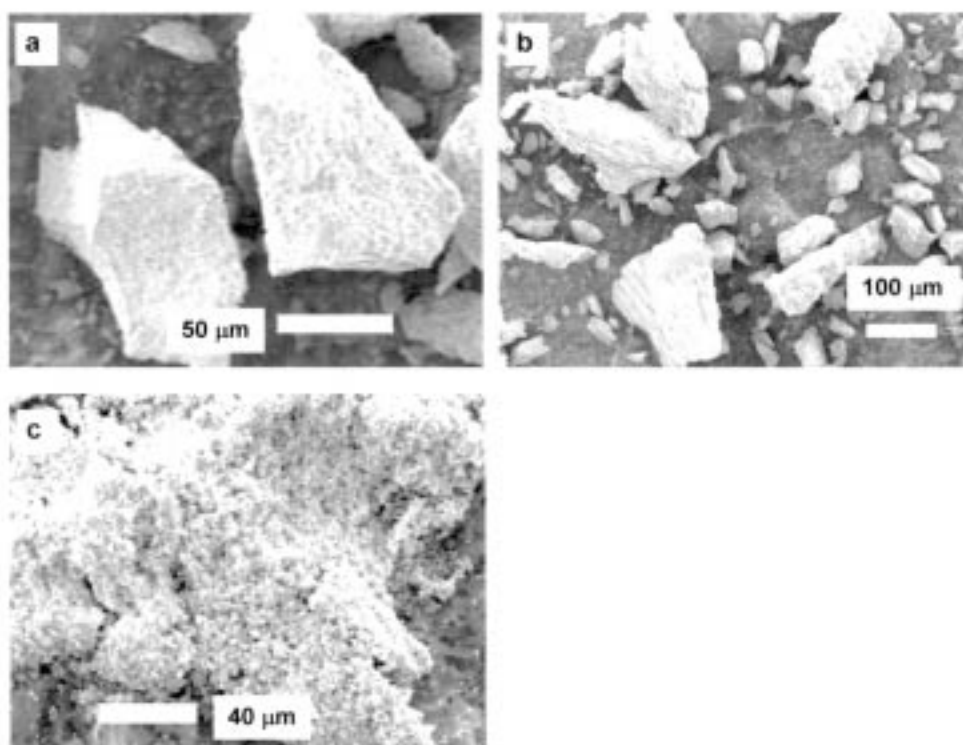

**Figure S-8.** FE-SEM images of the intermediate products obtained at the basic reaction mixture for 1 h (a) without and (b) with stirring, and (c) for 3 h without stirring.
